# Supplementary material for: Cultural adaption and validation of the Explanatory Model Interview Catalogue–Community Stigma Scale in the assessment of public stigma related to schistosomiasis in lakeshore areas of Mwanza region, Tanzania
Source: PLoS Negl Trop Dis. 2023 Aug 14;17(8):e0011534. doi: 10.1371/journal.pntd.0011534 (PMC10449129; doi:10.1371/journal.pntd.0011534)
Supplement: S1 Table — (XLSX) [file pntd.0011534.s002.xlsx]

## Sheet: Tabelle1
S1 Table Differences between the interviewers
					male interviewer 2
interviewer		N	M	SD	r	Z	P
male interviewer 1		50	6.08	6.35	.52	-5.32	.00
female interviewer 1		37	5.84	2.87	.43	- 4.08	.00
male interviewer 2		55	12.3	6.88	-	-	-
female interviewer 2		33	8.21	6.82	.31	2.92	.02
